# Supplementary material for: A Global Survey on Diagnostic, Therapeutic and Preventive Strategies in Intensive Care Unit—Acquired Weakness
Source: MDPI journal article supplement (doi:10.3390/medicina58081068), 2022-08-08
Supplement: s1 [file s1]

**Table S1: Participating countries.**

| <b>Countries</b>         | <b>Absolute values</b> | <b>Relative values (%)</b> |
|--------------------------|------------------------|----------------------------|
| Australia                | 18                     | 11.8                       |
| Spain                    | 15                     | 9.8                        |
| Germany                  | 14                     | 9.2                        |
| United Kingdom           | 13                     | 8.5                        |
| India                    | 10                     | 6.5                        |
| Italy                    | 8                      | 5.2                        |
| Switzerland              | 7                      | 4.6                        |
| France                   | 6                      | 3.9                        |
| Portugal                 | 6                      | 3.9                        |
| United States of America | 5                      | 3.3                        |
| Brazil                   | 5                      | 3.3                        |
| New Zealand              | 4                      | 2.6                        |
| Poland                   | 3                      | 2.0                        |
| Austria                  | 3                      | 2.0                        |
| Greece                   | 3                      | 2.0                        |
| Mexico                   | 3                      | 2.0                        |
| Russia                   | 2                      | 1.3                        |
| Finland                  | 2                      | 1.3                        |
| Ireland                  | 2                      | 1.3                        |
| Sweden                   | 2                      | 1.3                        |
| Romania                  | 2                      | 1.3                        |
| Canada                   | 2                      | 1.3                        |
| Turkey                   | 2                      | 1.3                        |
| Uruguay                  | 1                      | 0.7                        |
| Ecuador                  | 1                      | 0.7                        |
| Iceland                  | 1                      | 0.7                        |
| Sudan                    | 1                      | 0.7                        |
| Libya                    | 1                      | 0.7                        |
| Lebanon                  | 1                      | 0.7                        |
| Bahrain                  | 1                      | 0.7                        |
| Indonesia                | 1                      | 0.7                        |
| Japan                    | 1                      | 0.7                        |
| Singapore                | 1                      | 0.7                        |
| South Africa             | 1                      | 0.7                        |
| Saudi Arabia             | 1                      | 0.7                        |
| Netherlands              | 1                      | 0.7                        |
| Israel                   | 1                      | 0.7                        |
| Georgia                  | 1                      | 0.7                        |
| Egypt                    | 1                      | 0.7                        |
